# Supplementary material for: Peripheral natural killer cells and myeloid-derived suppressor cells correlate with anti-PD-1 responses in non-small cell lung cancer
Source: PubMed Central journal article supplement (PMC7270107; doi:10.1038/s41598-020-65666-x), 2020-06-03

Supplementary Figure 1

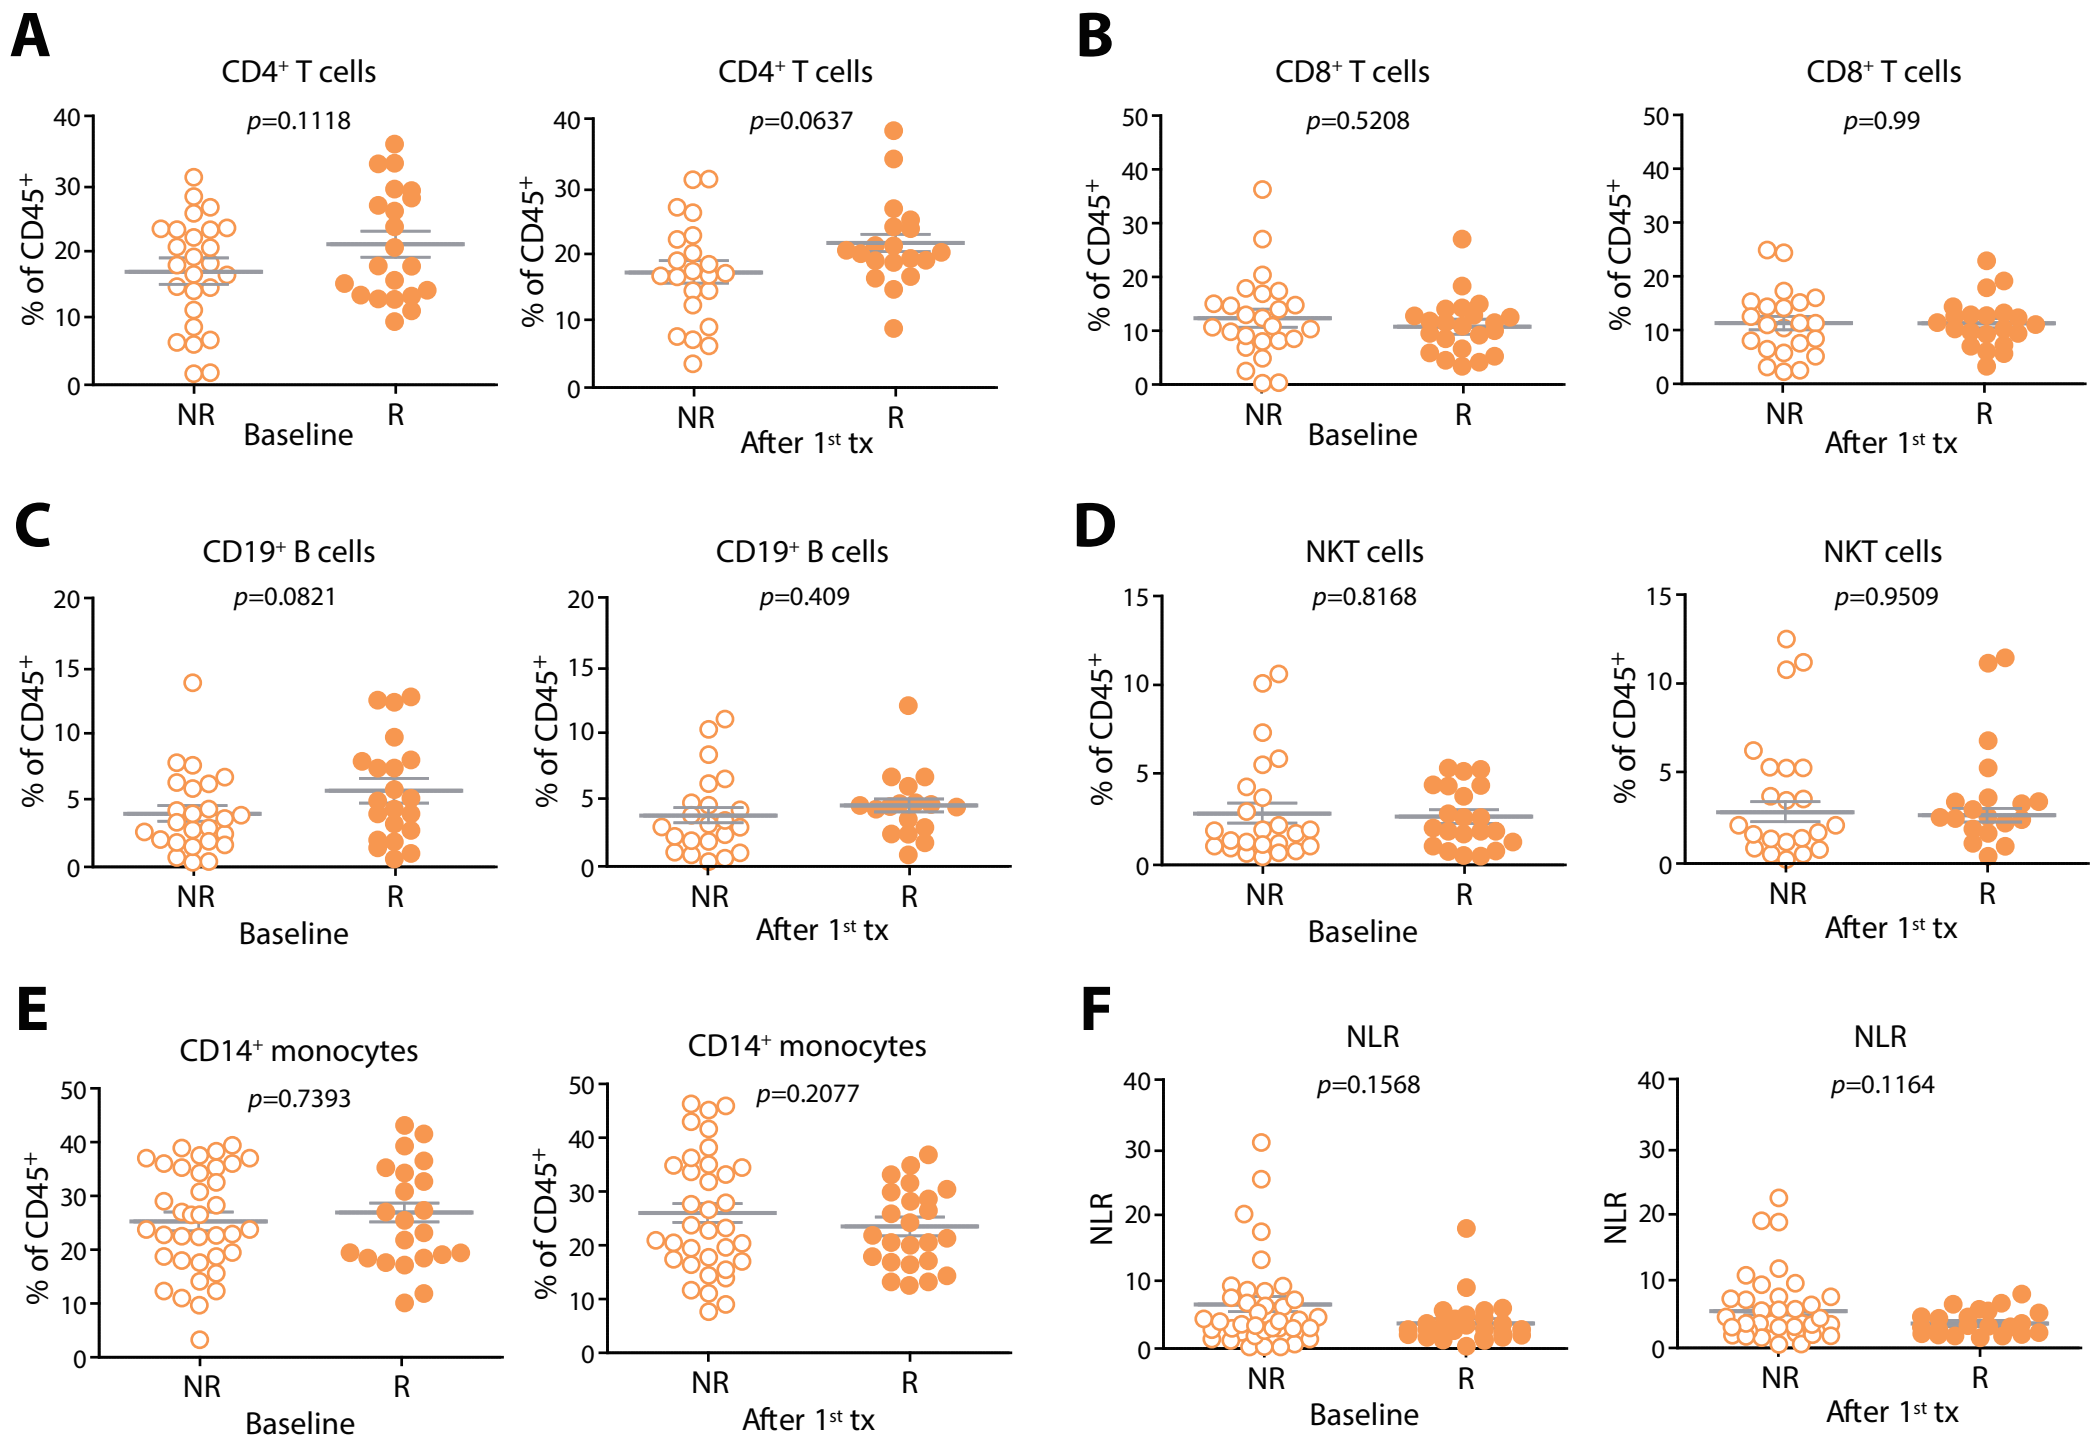

Supplement: 41598_2020_65666_MOESM2_ESM.pdf [file 41598_2020_65666_MOESM2_ESM.pdf]
